# Supplementary material for: A Search for Tick-Associated, Bronnoya-like Virus Spillover into Sheep
Source: MDPI journal article supplement (doi:10.3390/microorganisms11010209), 2023-01-13
Supplement: s1 [file s1]

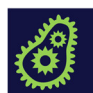

## Article

# A Search for Tick-Associated, Bronnaya-like Virus Spillover into Sheep

Bianca Elena Bratuleanu <sup>1,2</sup>, Cristian Raileanu <sup>2</sup>, Delphine Chrétien <sup>1,3</sup>, Pablo Guardado-Calvo <sup>4</sup>, Thomas Bigot <sup>1,5</sup>, Gheorghe Savuta <sup>2</sup>, Sarah Temmam <sup>1,3</sup> and Marc Eloit <sup>1,3,6,\*</sup>

<sup>1</sup> Pathogen Discovery Laboratory, Institut Pasteur, 75015 Paris, France

<sup>2</sup> Regional Center of Advanced Research for Emerging Diseases, Zoonoses and Food Safety (ROVETEMERG), “Ion Ionescu de la Brad”, Iasi University of Life Sciences, 700490 Iași, Romania

<sup>3</sup> WOA (OIE) Collaborating Centre for Detection and Identification in Humans of Emerging Animal Pathogens, Institut Pasteur, 75015 Paris, France

<sup>4</sup> Department of Virology, Structural Virology Unit, CNRS UMR 3569, Institut Pasteur, Université Paris Cité, 75015 Paris, France

<sup>5</sup> Bioinformatics and Biostatistics Hub, Université Paris Cité, Institut Pasteur, 75015 Paris, France

<sup>6</sup> Department of Biological and Pharmaceutical Sciences, Alfort National Veterinary School, 94700 Maisons-Alfort, France

\* Correspondence: marc.eloit@pasteur.fr

## Supplementary Materials

**Table S1.** List of sequences used in Figure 5.

| Viral Species                                                       | Viral Family          | Accession Number |
|---------------------------------------------------------------------|-----------------------|------------------|
| Wenling frogfish arenavirus 2                                       | <i>Arenaviridae</i>   | YP_009551605     |
| Salmon pescarenavirus 1                                             |                       | QEG08233         |
| Haartman Institute snake virus                                      |                       | YP_009666122     |
| Old schoolhouse virus 1                                             |                       | YP_010086255     |
| Argentinian mammarenavirus                                          |                       | NP_899217        |
| Lassa mammarenavirus                                                |                       | NP_694872        |
| Wenzhou mammarenavirus                                              |                       | YP_009113209     |
| CAS virus                                                           |                       | YP_006590093     |
| ROUT virus                                                          |                       | YP_009019197     |
| Wenling crustacean virus 9                                          | <i>Cruliviridae</i>   | YP_009329879     |
| Plasmopara viticola lesion-associated mycobunyavirales-like virus 8 | <i>Discoviridae</i>   | QJX19788         |
| Perilla mosaic virus                                                | <i>Fimoviridae</i>    | BDP45122         |
| European mountain ash ringspot-associated virus                     |                       | YP_003104764     |
| Perch actinovirus                                                   | <i>Hantaviridae</i>   | YP_010088064     |
| Wenling red spikefish hantavirus                                    |                       | YP_010085034     |
| Wenling hagfish virus                                               |                       | YP_010085035     |
| Hantaan orthohantavirus                                             |                       | NP_941982        |
| Imjin virus                                                         |                       | YP_009362290     |
| Hainan oriental leaf-toed gecko hantavirus                          |                       | YP_010085031     |
| Longquan Rhinolophus affinis hantavirus 1                           |                       | UOX72967         |
| Hangzhou leishbuvirus 1                                             | <i>Leishbuviridae</i> | UHK03244         |
| Hubei myriapoda virus 5                                             | <i>Myxoviridae</i>    | APG79329         |
| Grotenhout virus                                                    | <i>Nairoviridae</i>   | ARB16032         |
| Bandia virus                                                        |                       | AMT75383         |

|                                                 |                         |              |
|-------------------------------------------------|-------------------------|--------------|
| Dugbe orthonairovirus                           |                         | NP_690576    |
| Hazara virus                                    |                         | YP_009507850 |
| Leopards Hill virus                             |                         | YP_009111284 |
| Nairobi sheep disease virus                     |                         | YP_009361832 |
| Punta Salinas virus                             |                         | AMT75410     |
| Tamdy virus                                     |                         | UCJ02222     |
| Tofla virus                                     |                         | BAU51655     |
| Beiji nairovirus                                |                         | UXX19123     |
| Pacific coast tick nairovirus                   |                         | ARF07704     |
| Pustyn virus                                    |                         | QPD01613     |
| Sulina virus                                    |                         | QRR19155     |
| Crimean-Congo hemorrhagic fever orthonairovirus |                         | UXM19310     |
| South Bay virus                                 |                         | ANT80542     |
| Shayang Spider Virus 1                          |                         | YP_009300680 |
| Sanxia Water Strider Virus 1                    |                         | YP_009293594 |
| Xin Zhou Spider Virus                           |                         | AJG39272     |
| Pangolin orthonairovirus                        |                         | URZ29345     |
| Herbert virus strain F23/CI/2004                |                         | YP_009507855 |
| Khurdun virus                                   |                         | AHL27169     |
| Lakamha virus                                   |                         | QEO75951     |
| Abras virus                                     |                         | QLA47005     |
| Bertioga virus                                  |                         | QLA47081     |
| Catu virus                                      | <i>Peribunyaviridae</i> | YP_009507870 |
| Madrid virus                                    |                         | QLA46935     |
| Sororoca virus                                  |                         | YP_009666895 |
| Utinga virus                                    |                         | YP_009666923 |
| Pacui virus                                     |                         | YP_009666929 |
| Khasan virus                                    |                         | AII79370     |
| Santarem virus                                  |                         | QLA47032     |
| Tanga virus                                     |                         | QLA47025     |
| Scaphoideus titanus bunya-like virus 1          |                         | QIJ56910     |
| Ferak virus                                     |                         | YP_009664550 |
| Anopheles triannulatus orthophasmavirus         | <i>Phasmaviridae</i>    | YP_010086189 |
| Sanxia Water Strider Virus 2                    |                         | YP_010085075 |
| Wuhan Insect virus 2                            |                         | YP_009270651 |
| Notori virus                                    |                         | AWA82264     |
| Bhanja virus                                    |                         | YP_009141013 |
| Hubei diptera virus 3                           |                         | YP_009329894 |
| Citrus virus A                                  |                         | UUT43438     |
| Cumuto virus                                    |                         | YP_009664615 |
| Fitzroy Crossing tenui-like virus 1             |                         | QLJ83469     |
| Hubei diptera virus 4                           | <i>Phenuiviridae</i>    | YP_009330281 |
| Norway phlebovirus 1                            |                         | YP_010086240 |
| Laurel Lake virus                               |                         | YP_009667028 |
| Narangue virus                                  |                         | QHA33858     |
| Guadeloupe mosquito phasivirus                  |                         | QEM39249     |
| Rift Valley fever virus                         |                         | YP_003848704 |
| Uukuniemi phlebovirus                           |                         | AWH61706     |
| Leticia virus                                   |                         | AEL29649     |

|                                                    |                      |              |
|----------------------------------------------------|----------------------|--------------|
| Pidgey virus                                       |                      | AOX47534     |
| Apple rubodvirus 1                                 |                      | UUI77343     |
| Rice grassy stunt tenuivirus                       |                      | UOX74344     |
| Uukuniemi virus                                    |                      | NP941973     |
| Wenzhou Shrimp Virus 1                             |                      | AJG39256     |
| Blattodean phenui-related virus OKIAV261           |                      | QMP82311     |
| Melon severe mosaic tospovirus                     | <i>Tospoviridae</i>  | YP_009346017 |
| Tomato necrotic ringspot virus                     |                      | QQY96596     |
| Wuhan Millipede Virus 2                            | <i>Wupedeviridae</i> | YP_009666319 |
| Almazovo tick virus                                |                      | QPB70159     |
| Bronnoya virus isolate CT1                         |                      | USL85421     |
| Bronnoya virus isolate_NOR/A2/Bronnoya/2014        | Unclassified         | ASY03250     |
| Ixodes ricinus bunyavirus like virus 1 isolate CT5 | <i>Bunyavirales</i>  | USL85429     |
| Ubmeje virus                                       |                      | QKK82912     |
| Athtab bunya-like virus                            |                      | YP_009553307 |

|                     |                     | Arenaviridae | Cruliviridae | Discoviridae | Fimoviridae | Hantaviridae | Leishbuviridae | Mypoviridae | Nairoviridae | Proposed new family | Peribunyaviridae | Phasmaviridae | Phenuiviridae | Tospoviridae | Wupedeviridae |
|---------------------|---------------------|--------------|--------------|--------------|-------------|--------------|----------------|-------------|--------------|---------------------|------------------|---------------|---------------|--------------|---------------|
| Number of sequences |                     |              |              |              |             |              |                |             |              |                     |                  |               |               |              |               |
| 49                  | Arenaviridae        | –            | 0,005        | 0,007        | 0,005       | 0,005        | 0,006          | 0,006       | 0,004        | 0,005               | 0,006            | 0,005         | 0,005         | 0,006        | 0,005         |
| 1                   | Cruliviridae        | 0,557        | –            | 0,009        | 0,006       | 0,007        | 0,008          | 0,007       | 0,005        | 0,006               | 0,006            | 0,005         | 0,006         | 0,009        | 0,008         |
| 5                   | Discoviridae        | 0,300        | 0,637        | –            | 0,008       | 0,008        | 0,008          | 0,009       | 0,006        | 0,007               | 0,008            | 0,006         | 0,006         | 0,007        | 0,009         |
| 10                  | Fimoviridae         | 0,286        | 0,562        | 0,366        | –           | 0,006        | 0,006          | 0,006       | 0,005        | 0,006               | 0,005            | 0,005         | 0,005         | 0,006        | 0,006         |
| 36                  | Hantaviridae        | 0,346        | 0,644        | 0,420        | 0,380       | –            | 0,008          | 0,008       | 0,007        | 0,006               | 0,005            | 0,005         | 0,005         | 0,007        | 0,008         |
| 1                   | Leishbuviridae      | 0,555        | 0,891        | 0,616        | 0,615       | 0,677        | –              | 0,009       | 0,007        | 0,006               | 0,007            | 0,005         | 0,005         | 0,007        | 0,009         |
| 1                   | Mypoviridae         | 0,522        | 0,875        | 0,623        | 0,611       | 0,665        | 0,867          | –           | 0,005        | 0,006               | 0,006            | 0,005         | 0,005         | 0,006        | 0,007         |
| 21                  | Nairoviridae        | 0,236        | 0,599        | 0,342        | 0,328       | 0,384        | 0,587          | 0,565       | –            | 0,004               | 0,005            | 0,005         | 0,005         | 0,005        | 0,004         |
| 11                  | Proposed new family | 0,361        | 0,650        | 0,396        | 0,394       | 0,452        | 0,689          | 0,683       | 0,403        | –                   | 0,005            | 0,004         | 0,004         | 0,005        | 0,004         |
| 86                  | Peribunyaviridae    | 0,296        | 0,549        | 0,377        | 0,302       | 0,390        | 0,635          | 0,613       | 0,332        | 0,382               | –                | 0,006         | 0,005         | 0,007        | 0,007         |
| 13                  | Phasmaviridae       | 0,211        | 0,514        | 0,280        | 0,252       | 0,299        | 0,538          | 0,529       | 0,245        | 0,323               | 0,262            | –             | 0,005         | 0,006        | 0,005         |
| 98                  | Phenuiviridae       | 0,221        | 0,558        | 0,296        | 0,292       | 0,351        | 0,501          | 0,544       | 0,264        | 0,361               | 0,301            | 0,217         | –             | 0,007        | 0,006         |
| 24                  | Tospoviridae        | 0,343        | 0,625        | 0,419        | 0,360       | 0,446        | 0,676          | 0,657       | 0,377        | 0,453               | 0,342            | 0,308         | 0,344         | –            | 0,007         |
| 1                   | Wupedeviridae       | 0,531        | 0,870        | 0,624        | 0,612       | 0,660        | 0,867          | 0,863       | 0,540        | 0,688               | 0,606            | 0,531         | 0,536         | 0,665        | –             |

**Figure S1.** Estimates of net evolutionary divergence between *Bunyavirales* families. The number of amino-acid differences per site from estimation of net average between *Bunyavirales* families are shown. Standard error estimates (evaluated by 1000 bootstrap replicates) are shown above the diagonal. The analysis involved 357 amino acid sequences. All ambiguous positions were removed for each sequence pair. There were a total of 9817 positions in the final dataset. Evolutionary analyses were conducted in MEGA7.

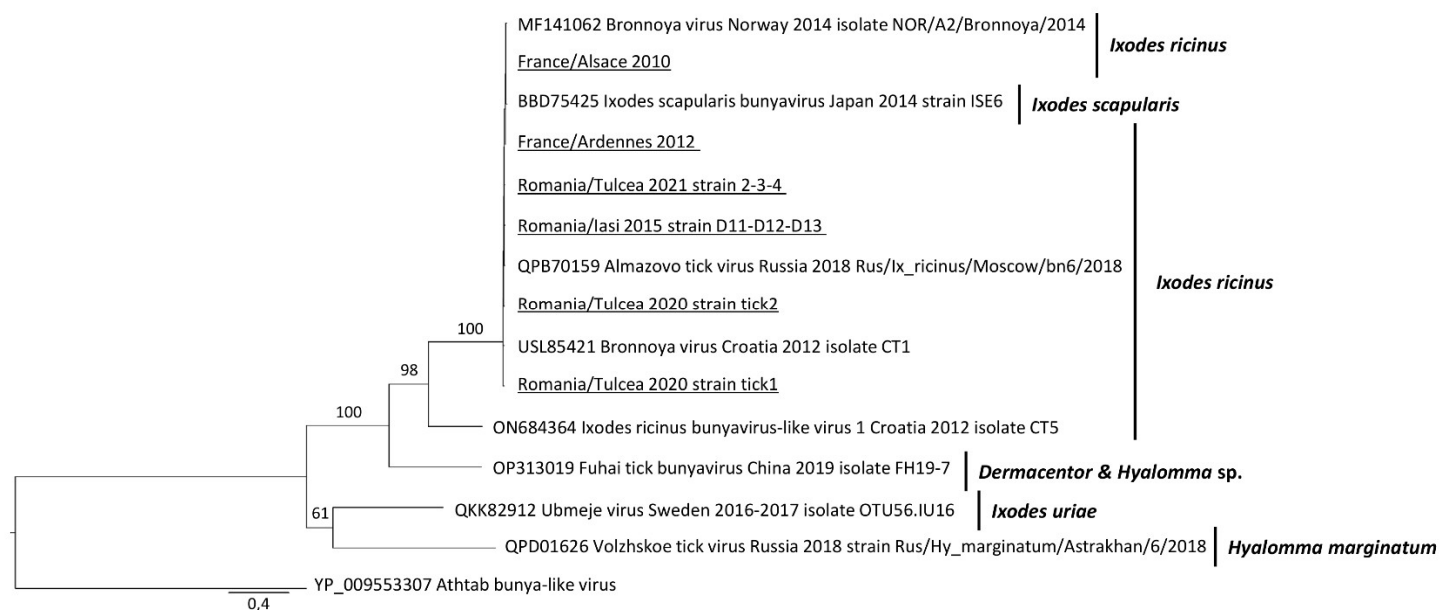

**Figure S2.** Phylogenetic reconstruction of the partial RNA-dependent RNA polymerase of the proposed new viral family. Sequences generated in this study are underlined.

**Disclaimer/Publisher's Note:** The statements, opinions and data contained in all publications are solely those of the individual author(s) and contributor(s) and not of MDPI and/or the editor(s). MDPI and/or the editor(s) disclaim responsibility for any injury to people or property resulting from any ideas, methods, instructions or products referred to in the content.
